# Supplementary material for: Emergence phenology, uncertainty, and the evolution of migratory behavior in Anax junius (Odonata: Aeshnidae)
Source: PLoS One. 2017 Sep 8;12(9):e0183508. doi: 10.1371/journal.pone.0183508 (PMC5591007; doi:10.1371/journal.pone.0183508)
Supplement: S11 Table — Cf. Table 1. Total Exv–total number of exuviae collected for the year; Exv Pk1 –exuviae collected during the first peak of emergence; Exv Pk2 –exuviae collected during the second peak of emergence; Min Day–day selected as defining the boundary between emergence peaks 1 and 2. (XLSX) [file pone.0183508.s013.xlsx]

## Sheet: Sheet1
Rainfall (cm) and emergence, KHMO
Year	Jan-Mar	Mar-May	May-July	May-Aug	July-Sept	May-Sept	Aug-Oct	Annual	Total Exv	Exv Pk1	Exv Pk2	Min Day
2004	13.11	33.35	38.79	34.48	40.97	64.42	80.88	107.07	1004	319	685	179
2005	22.65	20.17	15.9	22.2	20.62	33.86	64.54	102.36	159	.	.	.
2006	18.9	19.58	55.62	59.86	46.73	76.67	94.4	122.04	989	860	129	230
2007	19.72	17.91	21.69	26.39	29.92	39.85	67.31	93.7	87	68	19	212
2008	30.05	25.14	31.88	35.66	31.35	46.98	65.17	112.56	179	112	67	204
2009	12.58	21.16	31.26	32.66	27.43	43.06	54.85	82.49	151	33	118	203
2010	19.01	18.67	24.52	32.66	27.06	44.49	68.74	99.01	405	78	327	200
2011	22.1	36.6	24.88	22.19	35.86	56.22	82.74	112.05	725	151	572	196
2012	13.77	17.73	16.38	22.88	32.05	42.79	62.29	94.75	238	69	169	190
2013	12.8	18.11	34.31	43.99	46.53	56.97	73.51	107.65	558	.	.	.
